# Supplementary material for: Long non‑coding RNA SNHG1 promotes autophagy in vascular smooth muscle cells induced by facilitating CLEC7A
Source: PubMed Central journal article supplement — Mol Med Rep. 2024 Nov 5;31(1):20. doi: 10.3892/mmr.2024.13385 (PMC11564905; doi:10.3892/mmr.2024.13385), 2024-11-05
Supplement: Supplementary_Data1.pdf [file Supplementary_Data1.pdf]

Figure S1. RPI-Seq database predicts a potential relationship between SNHG1 and CLEC7A. It shows a screenshot of the interface for the SNHG1 RNA-CLEC7A Protein Interaction Prediction tool. The resulting probabilities generated by the Random Forest (RF) classifier are 0.85, and those generated by the Support Vector Machine (SVM) classifier are 0.74.

| IOWA STATE UNIVERSITY                                                                                                                                                                                                                                                                                                                                    |                                                                                                                                                                                                                                                                                                                                                                                                                                                                                                                                                                                                                                                                                                                                                                                                                                                                                                                                                                                                                                                                                                                                                                                                                                                                                                                                                                                                                                                                                                                                                                                                                                                                                                                                                                                                                                                                                                                                                                                                                                                                                                                                                                                                                                                                                                                                                                                                                                                                                                                                                                                                           |
|----------------------------------------------------------------------------------------------------------------------------------------------------------------------------------------------------------------------------------------------------------------------------------------------------------------------------------------------------------|-----------------------------------------------------------------------------------------------------------------------------------------------------------------------------------------------------------------------------------------------------------------------------------------------------------------------------------------------------------------------------------------------------------------------------------------------------------------------------------------------------------------------------------------------------------------------------------------------------------------------------------------------------------------------------------------------------------------------------------------------------------------------------------------------------------------------------------------------------------------------------------------------------------------------------------------------------------------------------------------------------------------------------------------------------------------------------------------------------------------------------------------------------------------------------------------------------------------------------------------------------------------------------------------------------------------------------------------------------------------------------------------------------------------------------------------------------------------------------------------------------------------------------------------------------------------------------------------------------------------------------------------------------------------------------------------------------------------------------------------------------------------------------------------------------------------------------------------------------------------------------------------------------------------------------------------------------------------------------------------------------------------------------------------------------------------------------------------------------------------------------------------------------------------------------------------------------------------------------------------------------------------------------------------------------------------------------------------------------------------------------------------------------------------------------------------------------------------------------------------------------------------------------------------------------------------------------------------------------------|
| Search Iowa State University <input style="width: 100px;" type="text"/>                                                                                                                                                                                                                                                                                  |                                                                                                                                                                                                                                                                                                                                                                                                                                                                                                                                                                                                                                                                                                                                                                                                                                                                                                                                                                                                                                                                                                                                                                                                                                                                                                                                                                                                                                                                                                                                                                                                                                                                                                                                                                                                                                                                                                                                                                                                                                                                                                                                                                                                                                                                                                                                                                                                                                                                                                                                                                                                           |
| <h2 style="margin: 0;">RNA-Protein Interaction Prediction (RPISeq)</h2> <p style="margin: 0;">Dobbs and Honavar Laboratories</p>                                                                                                                                                                                                                         |                                                                                                                                                                                                                                                                                                                                                                                                                                                                                                                                                                                                                                                                                                                                                                                                                                                                                                                                                                                                                                                                                                                                                                                                                                                                                                                                                                                                                                                                                                                                                                                                                                                                                                                                                                                                                                                                                                                                                                                                                                                                                                                                                                                                                                                                                                                                                                                                                                                                                                                                                                                                           |
| <b>Home</b>                                                                                                                                                                                                                                                                                                                                              | <b>Input Sequences</b>                                                                                                                                                                                                                                                                                                                                                                                                                                                                                                                                                                                                                                                                                                                                                                                                                                                                                                                                                                                                                                                                                                                                                                                                                                                                                                                                                                                                                                                                                                                                                                                                                                                                                                                                                                                                                                                                                                                                                                                                                                                                                                                                                                                                                                                                                                                                                                                                                                                                                                                                                                                    |
| <a href="#">About</a><br><a href="#">Datasets</a><br><a href="#">Related Links</a><br><a href="#">References</a><br><a href="#">Funding</a><br><a href="#">Contact Us</a>                                                                                                                                                                                | <p><b>Protein:</b><br/>           MEYHPDLENLDEDEGYTQLHFDSQSNTRIAVSEKGSACAASPPWRLIAVILGILCLVILVI<br/>           AVVLGTMGVLSSPCPPNWIIYEKSCYLFMSLSNSWDGSKRQCWQLGSLKIDSSNELGF<br/>           IVKQVSSQPDNSFWIGLSRPQTEVPWLWEDGSTFSSNLFQIRTTATQENPSPNCVWIHVS<br/>           VIYDQLCSVPSYSICEKKFSM</p> <p><b>RNA:</b><br/>           CUCAUUUUUCUACUGCUCGUGGUAUUACGCGCACGUUGGAACCGAAGAGAGCUCUGUUGU<br/>           UGCAAUGUUCAGCCCACAAGAGCJUACUGGUGAAGGAAUGGGACAAGACCAUCUUUAUG<br/>           CAAAGCCAGCGUUACAGUAAUGUUCAGCAUCUCAUAAUCUAUCCUGGGGAAUUCAGCUG<br/>           CCUCCAGGGUGAAUACAGGUAAUCCUGAUGACAGUCUGCCUCUAUCUUAACAGAGCAGCU<br/>           UGUUGCUAUUAACCAUUGAAAAGCCUUCAGAGCUGAGAGGUACUACUAACCAUUAACCG<br/>           CUUGGCUCAAAGGGCCAGCACCUUCUCUCUAAAGCCCAAGAGGAGUUUGAGGAAAACUAG<br/>           GUGUCUGUGUUCACUCCAGGCUGAAGUUACAGGUCUGAGCAAUAAGGUGUAUAAAAAAU<br/>           GGAUUCUGUCUUGGAGGACUACAAGGUGAAUUUCCAGUUCUUGGACAACCUAGCUG<br/>           UUGAAAAGCUUUCUGGGUUUGGGGGUUAUUUCAGAUUACCUUAAAGUGUUAGCAGACAC<br/>           AGAUUAAGACACUGGGAGCAAUGAAACAGCAGUUGAGGGUUUGCUGUGUAUCACAUUUC<br/>           UGUUUUUUAUCACCCCUUCCUGCAACAUUAUUUAUCUGGAAUCUACCUGCCUUUUGUU<br/>           UUUUAGAUACAAGGCUUGGUUUUGUUAACCCAGGCUGGUUUCAGGCCAUAGCUUUAAGA<br/>           GAUCCUCUACCCACAGAUUCCAAAGUGCUGGGAUUGCAGGUGUGAUUCAUGGCACCCAG<br/>           ACUUGCUGCCUUUCUACAUGAUCCAGGCCAGAACCCAAACUCAGGCACUGUAUAGAU<br/>           GACCACUUUCGUAACUACUGACCUAGCUUGUUGCCAAUUGUUGAUUGAACUCCCAUAA<br/>           CUCCACUUCGUCUGUCCUUGUAUACAGCCACCUUCUGUCCCGUAUGAGCCUUUA<br/>           GGUCUCCAUUUGCAUUAUGCAAUACUAGUUCUCCAUUGAGGUAGCUCUUAUCAGGCCUUG<br/>           CUCUUCACUUCAAAAAGGUUCCUUGAGGACUGGCUGUCAUUUGUGUUGCUGUGUUGG<br/>           UUGUUGAUGAAAAUAAUAAAUGAUUGAUUACAUAGUCCUGUUUAAAAAAAAAAAAA</p> <p><b>Interaction probabilities</b><br/>           Prediction using RF classifier 0.85<br/>           Prediction using SVM classifier 0.74</p> <p><b>What do these probabilities mean?</b><br/>           Interaction probabilities generated by RPISeq range from 0 to 1. In performance evaluation experiments, predictions with probabilities &gt; 0.5 were considered "positive," i.e., indicating that the corresponding RNA and protein are likely to interact. Using this threshold, accuracies of the classifiers ranged from 87 - 90% in cross-validation evaluation experiments on benchmark datasets. When classifiers were tested on independent (blind) datasets of RPIs, accuracies of the classifiers ranged from 57 - 99%.</p> <p>Please see <a href="#">About/FAQs</a> for additional details.</p> |
| <b>Links</b>                                                                                                                                                                                                                                                                                                                                             |                                                                                                                                                                                                                                                                                                                                                                                                                                                                                                                                                                                                                                                                                                                                                                                                                                                                                                                                                                                                                                                                                                                                                                                                                                                                                                                                                                                                                                                                                                                                                                                                                                                                                                                                                                                                                                                                                                                                                                                                                                                                                                                                                                                                                                                                                                                                                                                                                                                                                                                                                                                                           |
| <a href="#">Dobbs Lab Software</a><br><a href="#">Bioinformatics and Computational Biology</a><br><a href="#">Center for Computational Intelligence, Learning &amp; Discovery</a><br><a href="#">Department of Genetics, Development and Cell Biology</a>                                                                                                |                                                                                                                                                                                                                                                                                                                                                                                                                                                                                                                                                                                                                                                                                                                                                                                                                                                                                                                                                                                                                                                                                                                                                                                                                                                                                                                                                                                                                                                                                                                                                                                                                                                                                                                                                                                                                                                                                                                                                                                                                                                                                                                                                                                                                                                                                                                                                                                                                                                                                                                                                                                                           |
| <br><br><br> |                                                                                                                                                                                                                                                                                                                                                                                                                                                                                                                                                                                                                                                                                                                                                                                                                                                                                                                                                                                                                                                                                                                                                                                                                                                                                                                                                                                                                                                                                                                                                                                                                                                                                                                                                                                                                                                                                                                                                                                                                                                                                                                                                                                                                                                                                                                                                                                                                                                                                                                                                                                                           |
| <p style="margin: 0;"><b>IOWA STATE UNIVERSITY</b><br/> <i>Becoming the best.</i><br/>           RPISeq Version 1.0, Last updated 12/31/2011<br/>           Dobbs Lab, (515) 294 4991, usha (at) iastate.edu<br/>           Copyright © 2011 Dobbs Lab. All rights reserved.</p>                                                                         |                                                                                                                                                                                                                                                                                                                                                                                                                                                                                                                                                                                                                                                                                                                                                                                                                                                                                                                                                                                                                                                                                                                                                                                                                                                                                                                                                                                                                                                                                                                                                                                                                                                                                                                                                                                                                                                                                                                                                                                                                                                                                                                                                                                                                                                                                                                                                                                                                                                                                                                                                                                                           |
