# Supplementary material for: Long non‑coding RNA SNHG1 promotes autophagy in vascular smooth muscle cells induced by facilitating CLEC7A
Source: PubMed Central journal article supplement — Mol Med Rep. 2024 Nov 5;31(1):20. doi: 10.3892/mmr.2024.13385 (PMC11564905; doi:10.3892/mmr.2024.13385), 2024-11-05
Supplement: Supplementary_Data2.pdf [file Supplementary_Data2.pdf]

Table SI. Sequences of shRNA.

| Symbols      | Strand     | Sequence, 5'→3'                                                                        |
|--------------|------------|----------------------------------------------------------------------------------------|
| Vector-SNHG1 | Top strand | GATCCGTTCTCCGAACGTGTCACGTAATTCAAGAG<br>ATTACGTGACACGTTCCGAGAATTTTTTC                   |
|              | Antisense  | AATTGAAAAAATTCTCCGAACGTGTCACGTAATCT<br>CTTGAATTACGTGACACGTTCCGAGAACG                   |
| sh1-SNHG1    | Sense      | GATCCGGGAGCCAATGAAACAGCAGTTGAGTTCA<br>AGAGACTCAACTGCTGTTTCATTGGCTCCCTTTTTT<br>G        |
|              | Antisense  | AATTCAAAAAGGGAGCCAATGAAACAGCAGTTG<br><u>AGTCTCTTGA</u> ACTCAACTGCTGTTTCATTGGCTCCC<br>G |
| sh2-SNHG1    | Sense      | GATCCGTCCACTTCGTGTCTGTTCCCTCTGTATTCAA<br>GAGATACAGAGGAACAGACACGAAGTGGATTTTTT<br>G      |
|              | Antisense  | AATTCAAAAATCCACTTCGTGTCTGTTCCCTCTGTA<br>TCTCTTGAATACAGAGGAACAGACACGAAGTGGAA<br>CG      |
| sh3-SNHG1    | Sense      | GATCCGCCTTGAGGACTGGCTGTCAATTTGTTTCA<br>AGAGAACAAATTGACAGCCAGTCCTCAAGGTTTTT<br>TG       |
|              | Antisense  | AATTCAAAAACCTTGAGGACTGGCTGTCAATTTG<br>TTCTCTTGAAACAAATTGACAGCCAGTCCTCAAGG<br>CG        |

The specific shRNA sequence targeting the gene of interest is underlined. sh, short hairpin; SNHG1, small ribosome housekeeping gene RNA1.

Table SII. Sequences used for overexpression.

| Symbol | Sequence, 5'→3'                                                                                                                                                                                                                                                                                                                                                                                                                                                                                                                                                                                                                                                                                                                                                                                                                                                                                                                                                                                                                                                                                                                                                                                                                                                                                                                                                                                                                                                                                                                                                                        |
|--------|----------------------------------------------------------------------------------------------------------------------------------------------------------------------------------------------------------------------------------------------------------------------------------------------------------------------------------------------------------------------------------------------------------------------------------------------------------------------------------------------------------------------------------------------------------------------------------------------------------------------------------------------------------------------------------------------------------------------------------------------------------------------------------------------------------------------------------------------------------------------------------------------------------------------------------------------------------------------------------------------------------------------------------------------------------------------------------------------------------------------------------------------------------------------------------------------------------------------------------------------------------------------------------------------------------------------------------------------------------------------------------------------------------------------------------------------------------------------------------------------------------------------------------------------------------------------------------------|
| SNHG1  | <p>CTCATTTCCTACTGCTCGTGGTAAGTGGCTTCGTGGTCTTTAT<br/> AGCTGTTACTCTTTTGTACTTTGTCTTTTCTTTTATTTTCTTTT<br/> GAGCGATTGTGCGAACATAGCATAGCACGCACTATGCCTTCTG<br/> TGTTGTAGCTGCCTGGCCAGGGCGACTGGCGGATAAAGGTCTT<br/> GTGCGTGGCCTCGAGGCTTAAAAGTAGCAGTGGGGCTTTGTG<br/> AAGGACAAAATGGCGATGGCGGGCCGTGTAGGTCCCCCTTCC<br/> TATGATGAGGACCTTTTCACAGACCTGTACTGAGCTCCGTGAG<br/> GATAAATAACTCTGAGGAGATGGGCCCTGCAAGCCTCTTGCTT<br/> AGCCGTCTGTTTCAGAAAATAGCGTTTTTCGAAATGCCCTGAGTT<br/> GACCTAATGTCTTATTGGGCTCCTGTCTGCAGGATTTACGCGC<br/> ACGTTGGAACCGAAGAGAGCTCTGTTGTTGCAATGTTTCAGCC<br/> CACAAGAGCTTACTGGTGAAGGAATGGGACAAGACCCATCTT<br/> TATGCAAAGCCAGCGTTACAGTAATGTTCCAGCATCTCATAATC<br/> TATCCTGGGGAATTCAGCTGCCTCCCAGGGTGAATACAGGTAT<br/> TCCTGATGACAGTCTGCCTCTATCTTACAGAGCAGCTTGTTGCT<br/> ATATAACCATTGAAAAGCCTTCAGAGCTGAGAGGTACTACTAAC<br/> CAATAACCTGCTTGGCTCAAAGGGCCAGCACCTTCTCTCTAAA<br/> GCCCAAGAGGAGTTTGAGGAAAAGTGGTGTCTGTGTTCACT<br/> CCAGGCTGAAGTTACAGGTCTGAGCAAATAAGGTGTATAAAA<br/> AATGGAATCTGTCTTGGAGGACATCAGAAGGTGAATTTCCAA<br/> GTTCTTGGACAACCTAGCTGTTGAAAAGCTTTCTGGGTTTGGG<br/> GGGTATTCAGATGTACCTTAAAGTGTTAGCAGACACAGATTA<br/> AGACACTGGGAGCCAATGAAACAGCAGTTGAGGGTTTGCTGT<br/> GTATCACATTTCTGTATTTTATCACCCCCTTCCTGCAACATTATT<br/> TATCTGGAATCTACCTGCCCTTTTGTTTTTTAGATAACAAGGGCT<br/> TGGTTTTGTTACCCAGGCTGGTTTTCAAGGCCATAGCTTTAAGA<br/> GATCCTCTCACCACAGATTTCCAAAGTGCTGGGATTGCAGGTG<br/> TGATTCATGGCACCCAGACTTTGCTGCCTTTCTTACATGATCCA<br/> GGCCCAGAACCCTAACTCAGGCACTGTATAGATGACCACTTT<br/> CGTAAACTACTGACCTAGCTTGTGTTGCCAATTGTTGATTGAACT<br/> TCCCATAACTCCACTTCGTGTCTGTTCCCTCTGTATACAGCCACC</p> |

|        |                                                                                                                                                                                                                                                                                                                                                                                                                                                                                                                                                                                                                                                                                                                                                                                                                                              |
|--------|----------------------------------------------------------------------------------------------------------------------------------------------------------------------------------------------------------------------------------------------------------------------------------------------------------------------------------------------------------------------------------------------------------------------------------------------------------------------------------------------------------------------------------------------------------------------------------------------------------------------------------------------------------------------------------------------------------------------------------------------------------------------------------------------------------------------------------------------|
|        | TTCTGTTCCCGTCATGAGCCTTTAGGTCTCCATTTGCATATTGC<br>AAATACTATGTTCCATGTAGGTAGCTCATT CAGGGCCTTGCTCT<br>TCACTTCAAAAAGGTTCCCTTGAGGACTGGCTGTCAATTTGT<br>GTTGCTGTGTTGGTTGTTGATGAAAATAATAAAATGATTGATTA<br>CATAGTCCTGTTTAAAAAAAAAAAAAAAA                                                                                                                                                                                                                                                                                                                                                                                                                                                                                                                                                                                                                 |
| CLEC7A | ATGGAATATCATCCTGATTTAGAAAATTTGGATGAAGATGGATA<br>TACTCAATTACTTTCGACTCTCAAAGCAATACCAGGATAGCT<br>GTTGTTTCAGAGAAAGGATCGTGTGCTGCATCTCCTCCTTGGC<br>GCCTCATTGCTGTAATTTTGGGAATCCTATGCTTGGTAATACTG<br>GTGATAGCTGTGGTCCTGGGTACCATGGCTATTTGGAGATCCA<br>ATTCAGGAAGCAACACATTGGAGAATGGCTACTTTCTATCAAG<br>AAATAAAGAGAACCACAGTCAACCCACACAATCATCTTTAGA<br>AGACAGTGTGACTCCTACCAAAGCTGTCAAACCACAGGGGT<br>TCTTTCCAGCCCTTGTCCCTCCTAATTGGATTATATATGAGAAGA<br>GCTGTTATCTATTCAGCATGTCACTAAATTCCTGGGATGGAAGT<br>AAAAGACAATGCTGGCAACTGGGCTCTAATCTCCTAAAGATAG<br>ACAGCTCAAATGAATTGGGATTTATAGTAAAACAAGTGTCTTC<br>CCAACCTGATAATTCATTTTGGATAGGCCTTTCTCGGCCCCAG<br>ACTGAGGTACCATGGCTCTGGGAGGATGGATCAACATTCTCTT<br>CTAACTTATTT CAGATCAGAACCACAGCTACCCAAGAAAACCC<br>ATCTCCAAATTGTGTATGGATTCACGTGTCAGTCATTTATGACC<br>AACTGTGTAGTGTGCCCTCATATAGTATTTGTGAGAAGAAGTT<br>TTCAATGTAA |

SNHG1, small ribosome housekeeping gene RNA1; CLEC7A, C-type lectin domain containing 7A.

Table SIII. Primers used to determine the expression of genes by reverse transcription-quantitative PCR.

| Gene          | Forward                                | Reverse                                 | Products size, bp |
|---------------|----------------------------------------|-----------------------------------------|-------------------|
| SNHG1         | 5'-<br>CGTGGTAAGTGGCTTCGTGGT<br>C-3'   | 5'-<br>CCAGGCAGCTACAACACAGAA<br>GG-3'   | 121               |
| LC3           | 5'-<br>CCTGGACAAGACCAAGTTTT<br>G-3'    | 5'-<br>GTAGACCATATAGAGGAAGCC<br>G-3'    | 202               |
| P62           | 5'-<br>TGATTGAGTCCCTCTCCCAGA<br>TGC-3' | 5'-<br>CCGCTCCGATGTCATAGTTCTT<br>GG-3'  | 99                |
| $\alpha$ -SMA | 5'-<br>CCTTTGGCTTGGCTTGTCAG-<br>3'     | 5'-<br>AAGCTTTAGGGTCGCTGGAG-3'          | 83                |
| SM22a         | 5'-<br>GCTTGACGCTGGAAGTGGGA<br>AG-3'   | 5'-<br>CAGGGACAGACAAAGGTGGGT<br>AAAG-3' | 125               |
| OPN           | 5'-<br>CAGGAGGAGGCAGAGCACAG<br>-3'     | 5'-TGGTCGGCGTTTGGCTGAG-3'               | 80                |
| CLEC7<br>A    | 5'-<br>TACCTTGGGTAAAGCCATAAG<br>CG-3'  | 5'-<br>AGTTGAGGGTCAAATCGTGGC-<br>3'     | 111               |
| GAPD<br>H     | 5'-<br>TGACTTCAACAGCGACACCC<br>A-3'    | 5'-<br>CACCTGTTGCTGTAGCCAAA-<br>3'      | 121               |

Table SIV. Probe sequence for RNA pull-down.

| Gene              | Sequence, 5'→3'                                                                                                                                                                                                                                                                                                                                                                                                                                                                                                                                                                                                                                                                                                                                                                                                                                                                                                                                                                                                                                                                                                                                                                                                                                                                                                                      |
|-------------------|--------------------------------------------------------------------------------------------------------------------------------------------------------------------------------------------------------------------------------------------------------------------------------------------------------------------------------------------------------------------------------------------------------------------------------------------------------------------------------------------------------------------------------------------------------------------------------------------------------------------------------------------------------------------------------------------------------------------------------------------------------------------------------------------------------------------------------------------------------------------------------------------------------------------------------------------------------------------------------------------------------------------------------------------------------------------------------------------------------------------------------------------------------------------------------------------------------------------------------------------------------------------------------------------------------------------------------------|
| LACz<br>(Control) | TGGCCGTCGTTTTACAACGTCGTGACTGGGAAAACCCTGG<br>CGTTACCCAACCTAATCGCCTTGCAGCACATCCCCCTTTCGCCAGCTG<br>GCGTAATAGCGAAGAGGCCCGCACCGATCGCCCTTCCAACAGTTGC<br>GCAGCCTGAATGGCGAATGGCGCCTGATGCGGTATTTTCTCCTTACGC<br>ATCTGTGCGGTATTTACACCCGCATATGGTGC ACTCTCAGTACAATCT<br>GCTCTGATGCCGCATAG                                                                                                                                                                                                                                                                                                                                                                                                                                                                                                                                                                                                                                                                                                                                                                                                                                                                                                                                                                                                                                                         |
| SNHG1             | CTCATTCTTCTACTGCTCGTGGTAAGTGGCTTCGTGGTCTTTATAGCTG<br>TACTCTTTTGTACTTTGTCTTTTTCTTTTATTTTCTTTTGAGCGATTGT<br>GCGAACATAGCATAGCACGCACTATGCCTTCTGTGTTGTAGCTGCCTG<br>GCCAGGGCGACTGGCGGATAAGGTCTTGTGCGTGGCCTCGAGGCTTA<br>AAAGTAGCAGTGGGGCTTTGTGAAGGACAAAATGGCGATGGCGGGC<br>CGTGTAGGTCCCCCTTCTATGATGAGGACCTTTTCACAGACCTGTAC<br>TGAGCTCCGTGAGGATAAATAACTCTGAGGAGATGGGCCCTGCAAGC<br>CTCTTGCTTAGCCGTCTGTT CAGAAAATAGCGTTTTTCGAAATGCCCTG<br>AGTTGACCTAATGTCTTATTGGGCTCCTGTCTGCAGGATTTACGCGCA<br>CGTTGGAACCGAAGAGAGCTCTGTTGTTGCAATGTT CAGCCCACAAG<br>AGCTTACTGGTGAAGGAATGGGACAAGACCCATCTTTATGCAAAGCC<br>AGCGTTACAGTAATGTTCCAGCATCTCATAATCTATCCTGGGGAATTC<br>AGCTGCCTCCCAGGGTGAATACAGGTATTCCTGATGACAGTCTGCCT<br>CTATCTTACAGAGCAGCTTGTGCTATATAACCATTGAAAAGCCTTCAG<br>AGCTGAGAGGTACTACTAACCAATAACCTGCTTGGCTCAAAGGGCCA<br>GCACCTTCTCTCTAAAGCCCAAGAGGAGTTTGAGGAAA ACTAGGTGT<br>CTGTGTTCACTCCAGGCTGAAGTTACAGGTCTGAGCAAATAAGGTGT<br>ATAAAAAATGGAATCTGTCTTGGAGGACATCAGAAGGTGAATTTTCC<br>AAGTTCTTGGACAACCTAGCTGTTGAAAAGCTTTCTGGGTTTGGGGG<br>GTATTT CAGATGTACCTTAAAGTGTTAGCAGACACAGATTAAGACT<br>GGGAGCCAATGAAACAGCAGTTGAGGGTTTGCTGTGTATCACATTC<br>TGATTTTATCACCCCTTCTGCAACATTATTTATCTGGAATCTACCT<br>GCCCTTTTGTTTTTTAGATAACAAGGGCTTGGTTTTGTTACCCAGGCTG<br>GTTTCAAGGCCATAGCTTTAAGAGATCCTCTCACCACAGATTTCCAAA<br>GTGCTGGGATTGCAGGTGTGATTCATGGCACCCAGACTTTGCTGCCT |

|                                                                                                                                                                                                                                                                                                                                                                                         |
|-----------------------------------------------------------------------------------------------------------------------------------------------------------------------------------------------------------------------------------------------------------------------------------------------------------------------------------------------------------------------------------------|
| TTCTTACATGATCCAGGCCAGAAACCCAAACTCAGGGCACTGTATAGAT<br>GACCACTTTCGTAAACTACTGACCTAGCTTGTTGCCAATTGTTGATTG<br>AACTTCCCATAACTCCACTTCGTGTCTGTTCCCTCTGTATACAGCCACC<br>TTCTGTTCCCGTCATGAGCCTTTAGGTCTCCATTTGCATATTGCAAATA<br>CTATGTTCCATGTAGGTAGCTCATTCAAGGGCCTTGCTCTTCACTTCAA<br>AAAAGGTTCCTTGAGGACTGGCTGTCAATTTGTGTTGCTGTGTTGG<br>TTGTTGATGAAAATAATAAAATGATTGATTACATAGTCCTGTTTAAAA<br>AAAAAAAAA |
|-----------------------------------------------------------------------------------------------------------------------------------------------------------------------------------------------------------------------------------------------------------------------------------------------------------------------------------------------------------------------------------------|

SNHG1, small ribosome housekeeping gene RNA1.
